# Supplementary material
Source: PubMed Central journal article supplement (PMC2733775)
Supplement: cwn107_1.pdf [file cwn107_1.pdf]

# Revised Supplemental Figures for GYCO-2008-00148

```

G1      SIKSVIRDSQHITHGPIFSYDRALITLARSKHSSKCPISYIDIVNLKSPLRLGLVLCDDIN
Dr      ---NLCLDKINALHKPAYEHP-----KDLKASSGRLRVGYISSDFG
          .:  * . :  * * :.:                *:   .. **:* :..*:.

G1      SIPIGCILESWLNRNIDPKVASLSIYSTVASDKSALRTSLEAHCSNFIDFTNYKYQNNPFL
Dr      NHPTSHLMQSIPGMHNSEKFEVFCYALSPDDGTNFRVKVMAEAHHFIDLSQIPCNG---K
          . * . :.:*      :.: .:  *:   ..* : :*..: *.. :****: : .

G1      CAQRINGDGCIMISMCQHNCGLEGRILAMRPAPIQISYWTHGGTTNSNYLDYILADQYC
Dr      AADRIHQDGIHILVNMNGYTKGARNELFALRPAPIQAMWLAYPGTSGAPFMDYIVSDKAT
          .****: *** *:.: * .: * ..: :*:***** : : : **:.: :****: : :

G1      IPPGYAHLYSEHVITMPGCFICPSHSMHYSNAILLEEHADILKVTVEEVRSLIQDSKPDII
Dr      SPIEVAEQYSEKLAYMPNTFFIGDHANMFP-----HLKKKAVI
          *  * . ****: : ** . *:  .*:  :.                ..* . *
    
```

## GAP

```

G1      KKMEPLLKAIYPLQRIASEAAVPASMEKSENNSDLTSHRVCLELPLYRKNIRALYGI PAN
Dr      -----GLATTQINNKAATGEEVPR-----TIVVTTRSQYGLPED
          . : * .:***. .: :                . *: **:* :

G1      CFLFCTFNQVYKFDMGTLGIIAALLRSVPNAYYALLKFPPASQLHIEAFFRHKAPDILDR
Dr      SIVYCNFNQLYKIDPPTLQMWANILKRVPN SVIWLRLRFPVAVGEPNIQQYAQNLG--LPAS
          .: : * . ****:***: * * : * :*: ***:  **:*..: :*: : : : . :

G1      VIFLSMLPMKVEHIRRYLAVDVFDLTKCNGSTIVLDALWVGVPVGVFVGEYILSRKTL S
Dr      RIIFSPVAPKEEHVRRGQLADVCLDTPLCNGHTTGMDVLWAGT P MVTMPGETLASRVAAS
          * : : * . * ****: * ** :** *** * :*.***:*.*** : ** : ** : *

G1      FLSVLECKDLICASQGEAVLLCTRLAVDSGYYSVRKRILKNRSN--LFNISRWCDNFVL
Dr      QLTCLGCPELIAQSRQYEDVAVKLGTDMEFLKKVRARVWKQRICSPLFNTKQYTM DLEK
          *: * * :***. *: * .:..*..* : . ** *: ** * *** .: : :

G1      TMMLAYKNWIFGGKPTSFSTERVIANVKSQGF SWPLKSTGAQ
Dr      LYLQMWENHASGGKPDHLVKMQSLETSEST-----
          : : : * **** : . : : . : *
    
```

Supplemental Fig. 1. Alignment of the catalytic “spy” domain of the *Giardia lamblia* (G1) OGT with that of *Danio rerio* (Dr). Stars indicate identity, while periods and colons indicate similarity. **In the alignable portions of the sequences there is a 29% amino acid identity and a 65% amino acid similarity.** Note there is a gap in the alignment, because there is a large insert in the “spy” domain of the *Giardia* OGT.

Cp LGFIDQAILCYERISRINQNCITTLNVIAALYGNIGKIDESYEYFKRCIEVNVQGVDPDVYN  
Ph RDNLDKAVECYQMALTIKPNFSQSLNNGVVYTVQGMDDAAASMIKAIIANPTYAEAYN  
. :\*: \*: \*: \* :\*: :. :\* :\*: \* : . :\*: . \* . :. :\*

Cp NLGVLYRDCGNFLMAKNCFVLALELDPNHTLAFQNLLEYILNYFIPLDNPKLIGNIRNNSI  
Ph NLGVLYRDAGNISLAIEAYEQCLKIDPDSRNAGQNRLLAMNYINEGSDDKLYEAHR----  
\*\*\*\*\*. \*: :\* :. : . \* :\*: : \* \* \* :\*: : . : \* \* \*

Cp ESIINNLDSEKSLCLDISSTPESYVCESQIWINNSDYINYQDMYDLSLEWGDKFIEIH  
Ph -----DWGWRFMRLY  
: \* \* : \* : . : :

Cp REIKNRLDDLPIAIEIPDIESTSDKQLINIGFVGAEYFHHAVAFFILAPIKFLIKNFNFSKN  
Ph QQYN-----SWDNSKDPERQLVIGYVSPDYFTHSVSYFIEAPLAYHDYAN---  
: : : . : \* . : : : \* : \* . : \* \* \* : \* : : \* \* \* : :

Cp STRDCNIEGNSQVKLNIFYDNSPHHDYSCFFKDLIPSEN--WRYIHGKDIEFSSKLIR  
Ph -----YKVVIIYSAVVKADAKTNRFRDKVLKGGVWRDIYGIDEKKVSSMIR  
: : . \* \* . : \* : \* : \* : : . : . \* \* \* : \* : \* \* :

Cp SDNIHILFDLSGHTVNNCLALFALKNSPIQISWIGYPNTTGLKYIDYRITDKIVDPLHTK  
Ph EDKVDIMIELTGHTANNKLGMMACRPAPVQVTFWIGYPNTTGLPTIDYRITDSMADPPSTK  
. \* : . \* : : \* : \* \* . \* \* \* . : \* : : \* : \* : \* : \* : \* : \* : \* : \* : \* : \* \* \*

Cp QKYSEKLLYLPNCFLCYTLPKIQHPPISEPPMKKNGFITFGSFNRVTKLHPLTIELWGEV  
Ph QKHVEELVRLPDSFLCYTP-SPEAGPVSPAPALTNGFVTFGSFNMLAKITPKVLQVWARI  
\* \* : \* : \* : \* \* : \* \* \* \* . : \* : \* . \* . \* \* : \* \* \* \* . : : \* : \* : \* . : :

Cp LKSVPESHLLLKSKAFSSQSCCNFYLEIFKSKYNIQPHRISLIPLSNSYYSHLELYNDID  
Ph LCAVPHSRLIVKCKPFGCDSVRQRFLSILEQLG-LEPQRVDLVPLILLNHDHMAYSLMD  
\* : \* \* . \* : : \* : \* . \* . : \* : : \* . : : : \* : \* \* : . : : \* . : \*

Cp ISLDTFPYAGTTTTFECIFMGVPLITLSIDQSENSQIDSSDIYTEISSFHSQNVGRSILT  
Ph ISLDTFPYAGTTTTCESLYMGVPCVTMGG-----SVHAHNQVGSLLK  
\*\*\*\*\* \* . : \* \* \* : \* : . \* . : \* : \* \* \* \* \* . :

Cp NLNLNELIASNKKEFIKAALS LANDTERLIYRSNLRRILTESKLCDEKFSRDFEFELIL  
Ph TVGLRKLVARNEDEYVELAIQLASDVTSLSNLRMSLRELMASPLCDGAQFTQNLESTYR  
. : . \* . : \* \* \* \* : \* : : \* : \* \* . \* \* \* . \* \* . : : : \* \* \* \* : \* : : : .

Supplemental Fig. 2. Alignment of the catalytic “spy” domain of the *Cryptosporidium parvum* (Cp) OGT with that of *Petunia hybrida* (Ph). Stars indicate identity, while periods and colons indicate similarity. **In the alignable portions of the sequences there is a 39% amino acid identity and a 76% amino acid similarity.**
